# Supplementary material for: Magnetic-field-assisted hydrothermal synthesis of 2 × 2 tunnels of MnO2 nanostructures with enhanced supercapacitor performance
Source: Royal Society of Chemistry journal article supplement (doi:10.1039/c4ce01385a), 2014-01-01
Supplement: c4ce01385a1.pdf [file c4ce01385a1.pdf]

## Magnetic-field-assisted hydrothermal synthesis of $2 \times 2$ tunnels of $\text{MnO}_2$ nanostructures with enhanced supercapacitor performance

Jiajia Shao,<sup>a, ‡</sup> Wenyao Li,<sup>a, b, ‡</sup> Xiying Zhou<sup>a, \*</sup> and Junqing Hu<sup>b, \*</sup>

<sup>a</sup>*School of material engineering, Shanghai university of engineering science, Shanghai 201620, China.*

<sup>b</sup>*State Key Laboratory for Modification of Chemical Fibers and Polymer Materials, College of Materials Science and Engineering, Donghua University, Shanghai 201620, China.*

\* E-mail: [xiyingzhou@yahoo.com](mailto:xiyingzhou@yahoo.com); [hu.junqing@dhu.edu.cn](mailto:hu.junqing@dhu.edu.cn)

### Supplementary Figures

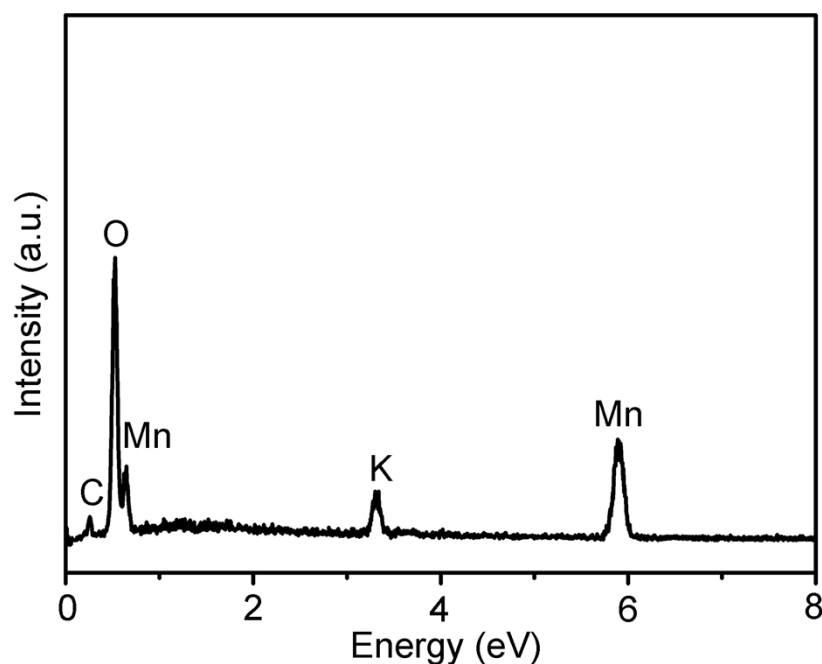

Fig. S1 EDS pattern taken from  $\text{MnO}_2$  nanoflower-wires.

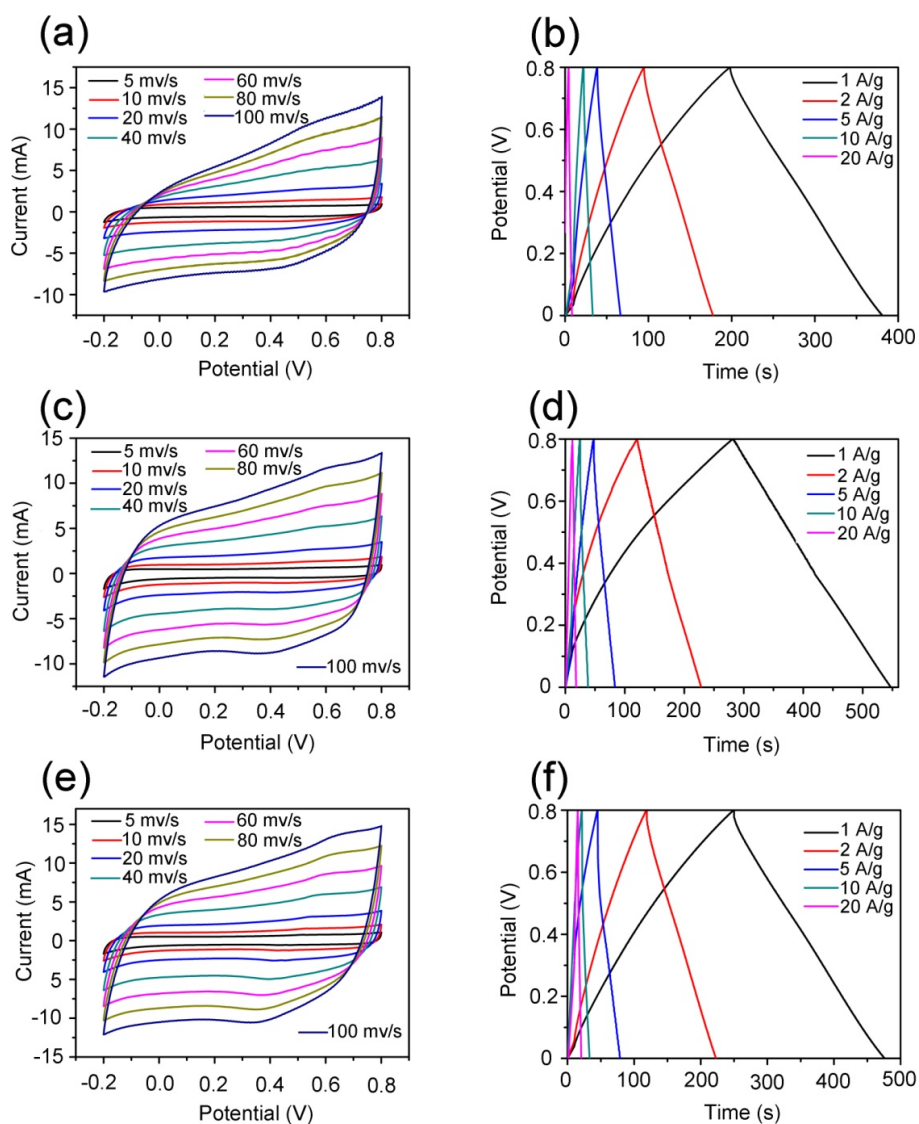

**Fig. S2** (a, c, e) CV curves at various scan rates and (b, d, f) charge-discharge curves at different current densities of 0T nanoflowers, 0.3T nanoflower-needles and 0.6T nanoflower-wires MnO<sub>2</sub> electrodes, respectively.
